# Supplementary material for: Wild Grapevine (Vitis vinifera L. Subsp. Sylvestris (C.C. Gmelin) Hegi) – Novel Species to the Israeli Flora
Source: Preprints.org preprint supplement (doi:10.20944/preprints202308.0187.v2), 2023-08-18
Supplement: Supplementary file 1 [file supplementary]

**Supplementary Figure**


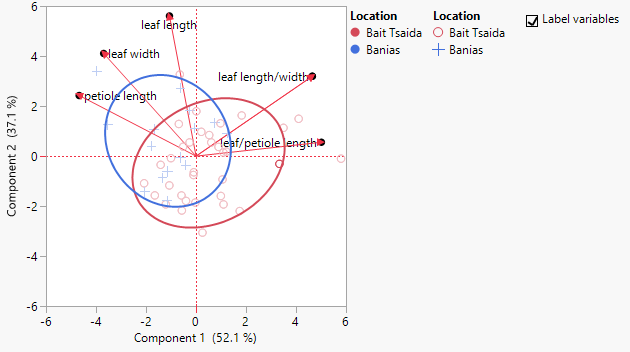


Supplementary Figure 1: PCA (Principal component analysis) biplot analysis performed on 46 Sylvestris accessions, using the leaves and petioles measured data. Red marks Bait Tsaida's accessions, and blue marks Bania's accessions. Ellipses density distribution is 0.8.
